# Supplementary material for: Molecular diversity within the genus Laeonereis (Annelida, Nereididae) along the west Atlantic coast: paving the way for integrative taxonomy
Source: PubMed Central journal article supplement (PMC8164838; doi:10.7717/peerj.11364), 2021-05-27

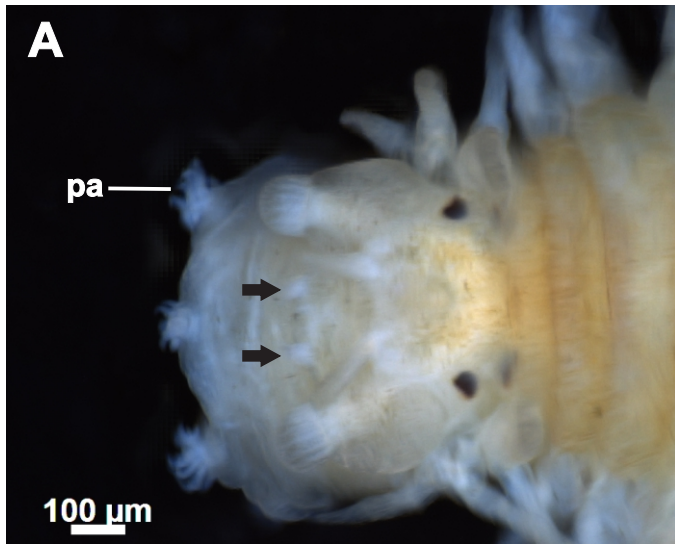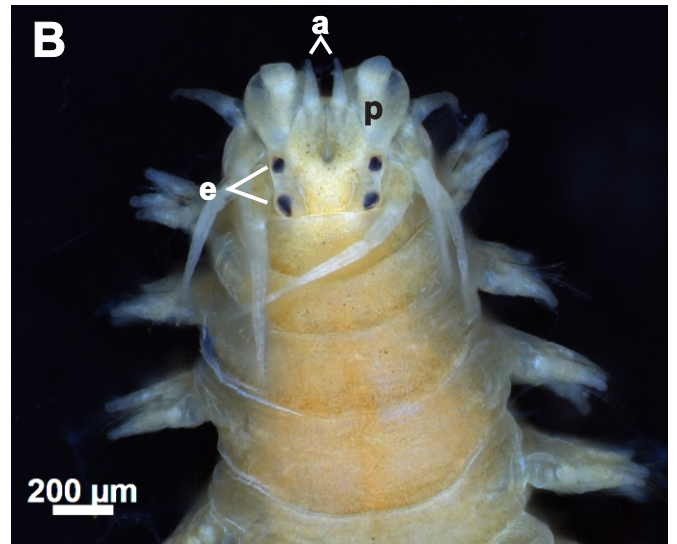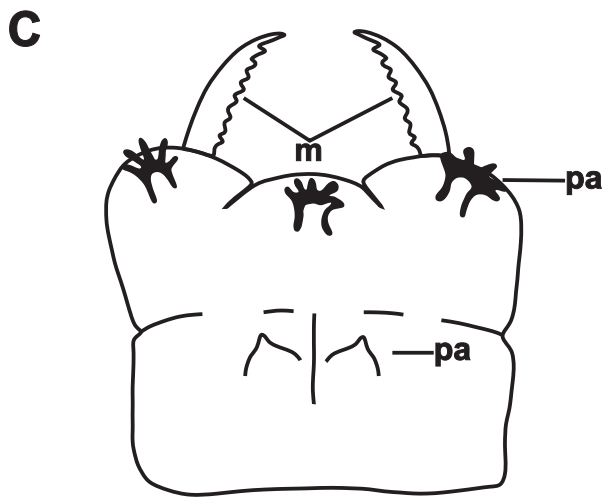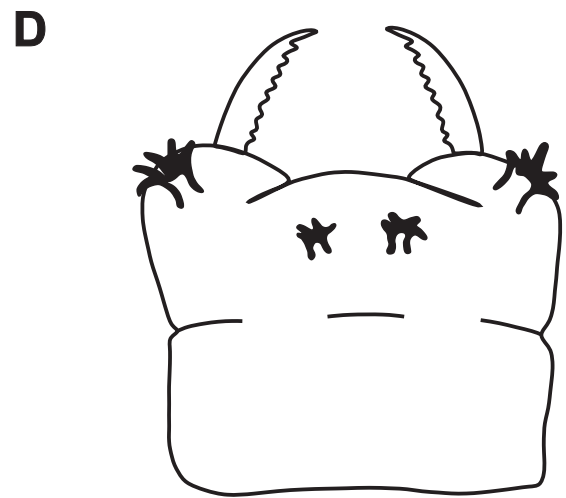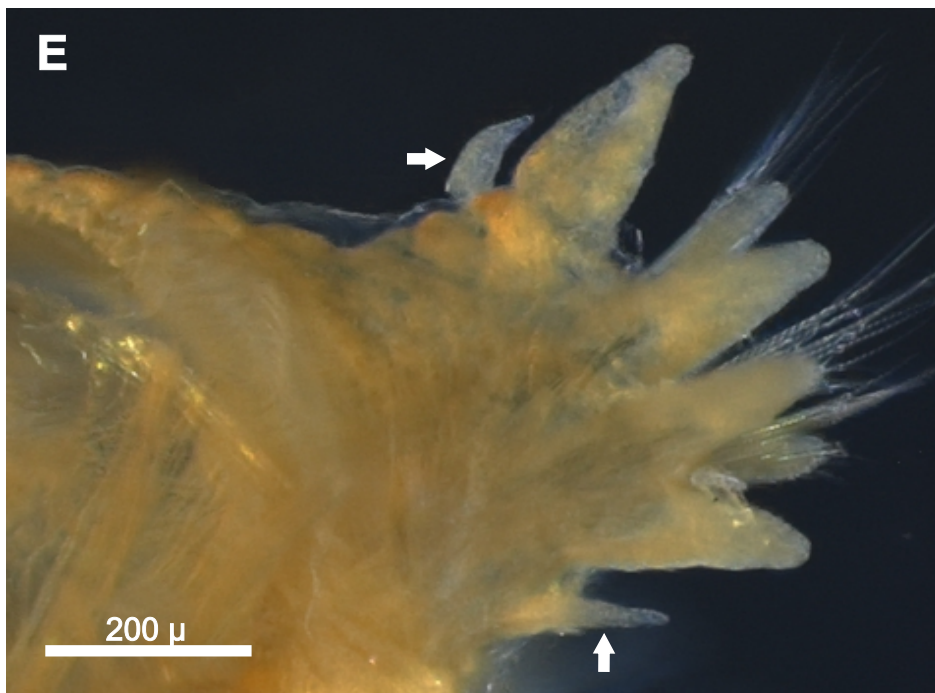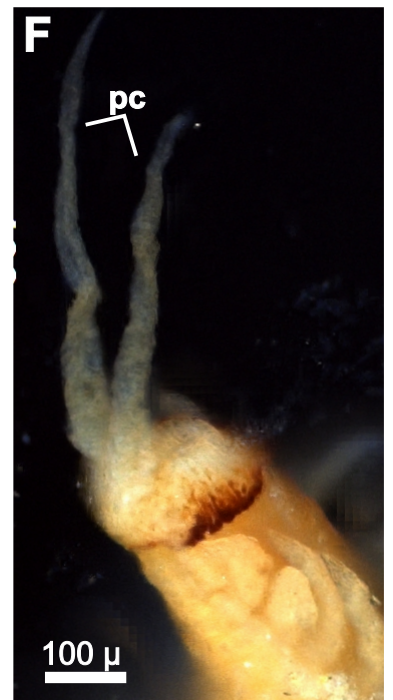

Supplement: peerj-09-11364-s004.pdf [file peerj-09-11364-s004.pdf]
